# Supplementary material for: High Breakdown Strength and Energy Storage Density in Aligned SrTiO3@SiO2 Core–Shell Platelets Incorporated Polymer Composites
Source: MDPI journal article supplement (doi:10.3390/membranes11100756), 2021-09-30
Supplement: s1 [file s1]

# High breakdown strength and energy storage density in aligned $\text{SrTiO}_3/\text{SiO}_2$ core-shell platelets incorporated polymer composites

Jie Chen<sup>1</sup>, Xiaoyong Zhang<sup>1</sup>, Xiao Yang<sup>2</sup>, Chuanyang Li<sup>3</sup>, Yifei Wang<sup>3,\*</sup>, Weixing Chen<sup>1</sup>

<sup>1</sup> Shaanxi Key Laboratory of Optoelectronic Functional Materials and Devices, School of Materials Science and Chemical Engineering, Xi'an Technological University, Xi'an 710032, China; chenjie@xatu.edu.cn

<sup>2</sup> School of Electrical and Electronic Engineering, North China Electric Power University, Beijing, 102206, China; yangxiao@ncepu.edu.cn

<sup>3</sup> Electrical Insulation Research Center, Institute of Materials Science, University of Connecticut, Storrs, Connecticut 06269, USA; chuanyang.li@uconn.edu

\* Correspondence: y.wang@uconn.edu

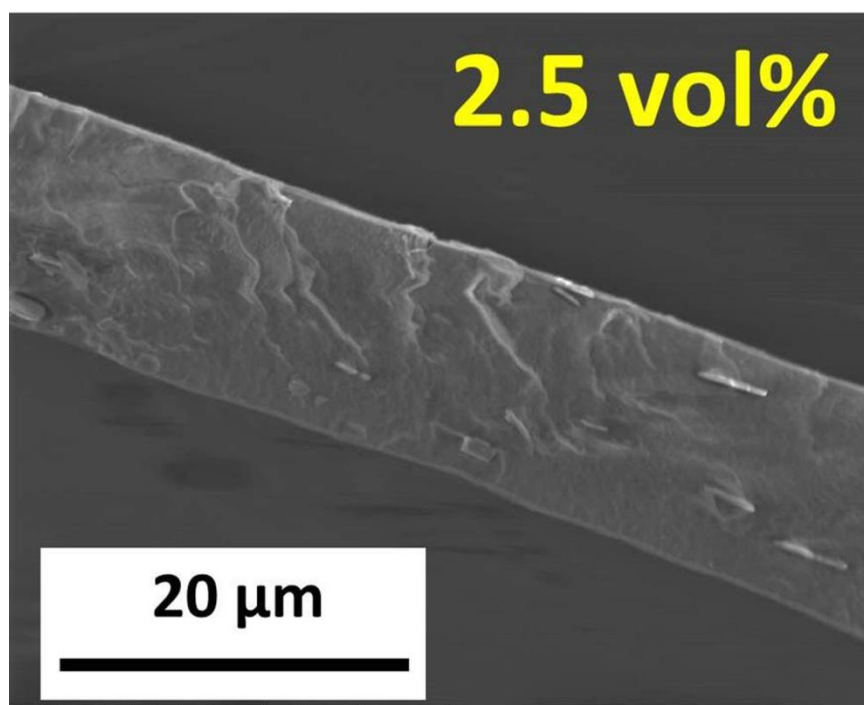

**Figure S1.** Cross-section SEM images of composites filled with 2.5 vol%  $\text{SrTiO}_3\text{@SiO}_2$  platelets.

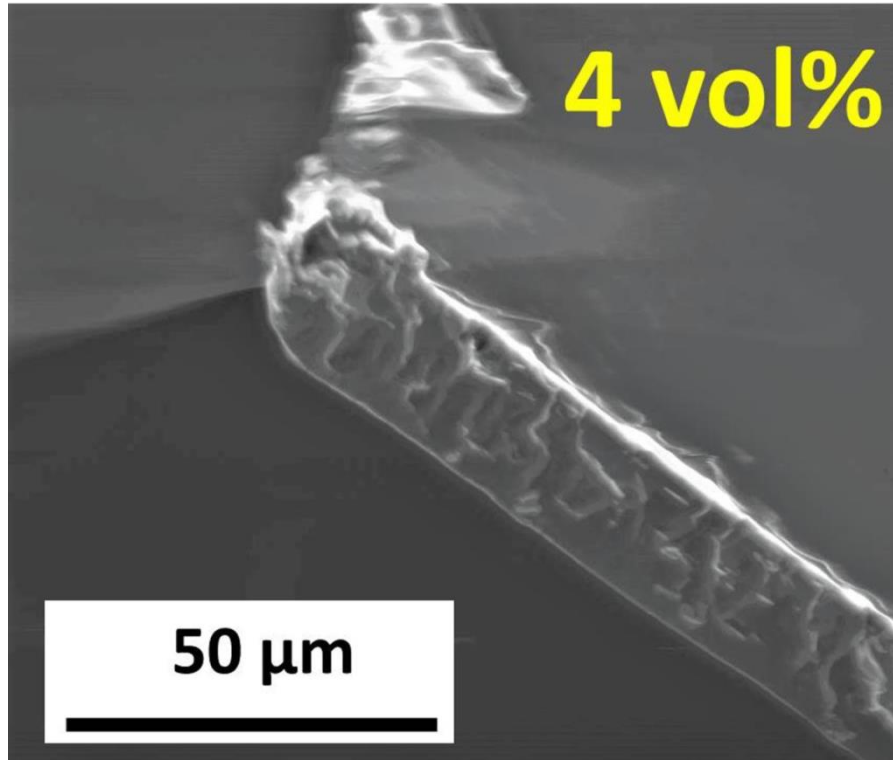

**Figure S2.** Cross-section SEM images of composites filled with 4 vol%  $\text{SrTiO}_3\text{@SiO}_2$  platelets.

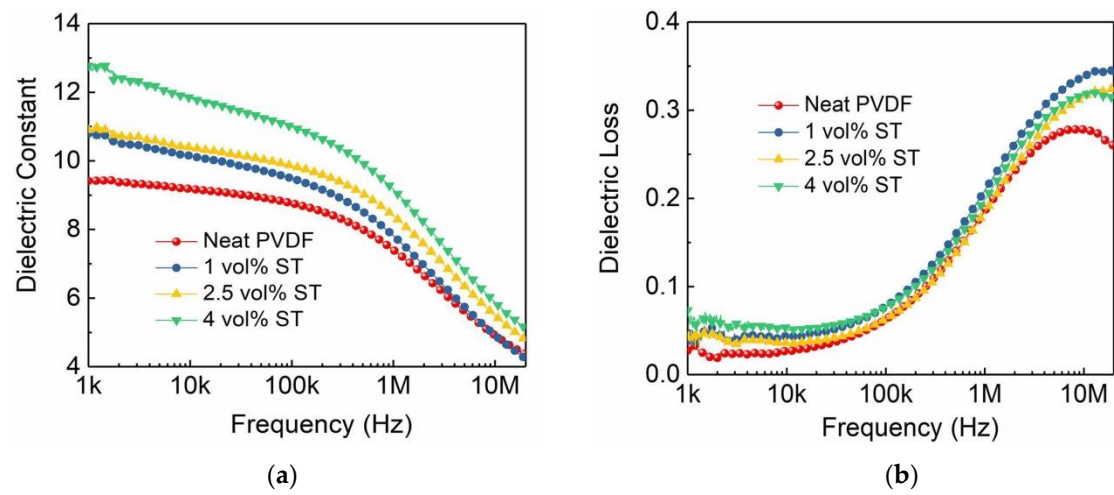

**Figure S3.** (a) Dielectric constant, (b) dielectric loss as a function of frequency of PVDF and composites filled with SrTiO<sub>3</sub> platelets.

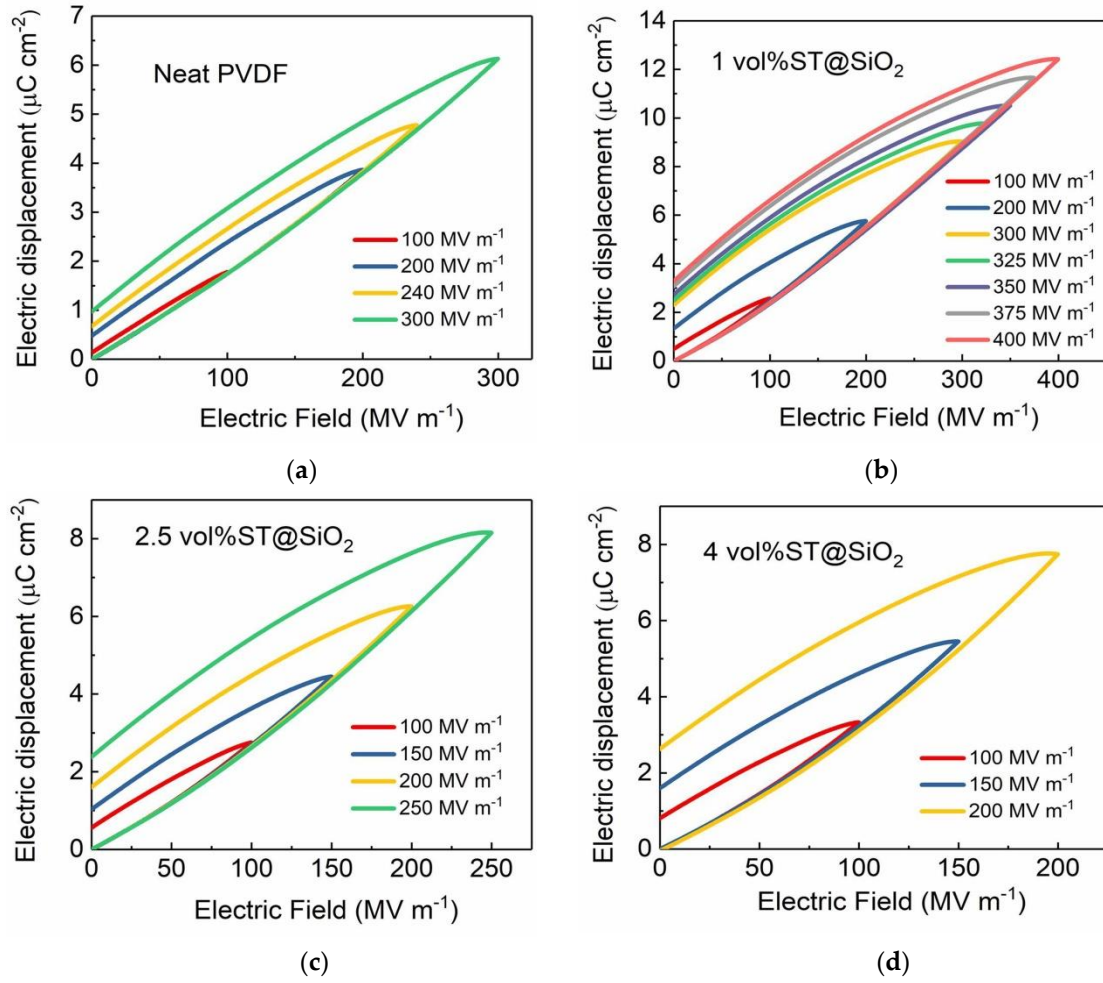

**Figure S4.** Unipolar electric displacement–electric fields ( $D$ – $E$ ) loops at varied electric fields of (a) PVDF and (b–d) composites filled with  $\text{SrTiO}_3@\text{SiO}_2$  platelets.

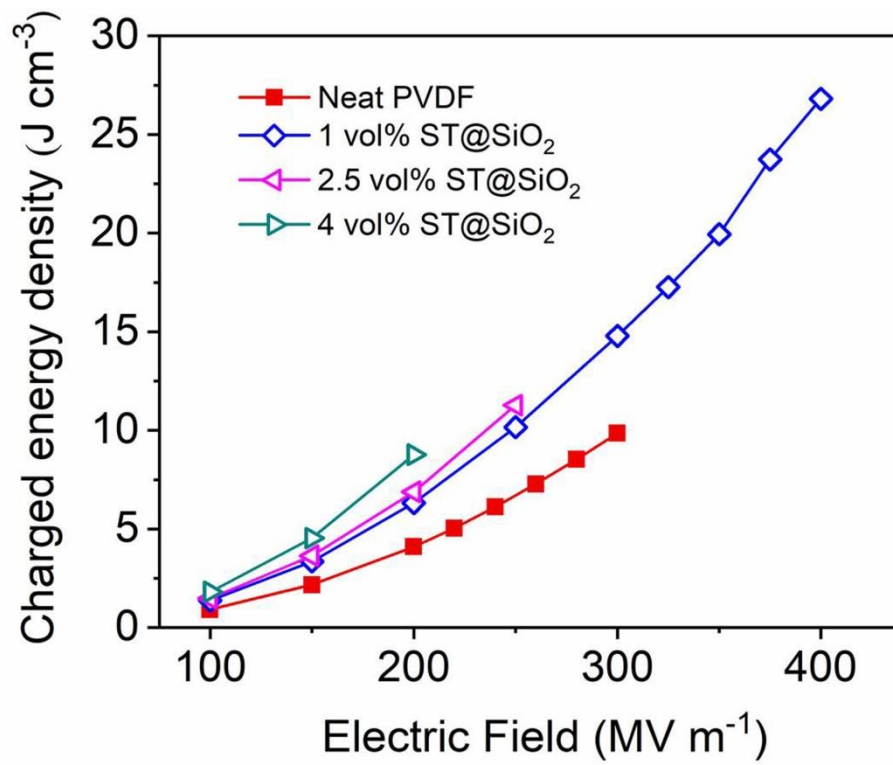

**Figure S5.** Charged energy density at varied electric fields of PVDF and composites filled with SrTiO<sub>3</sub> platelets.

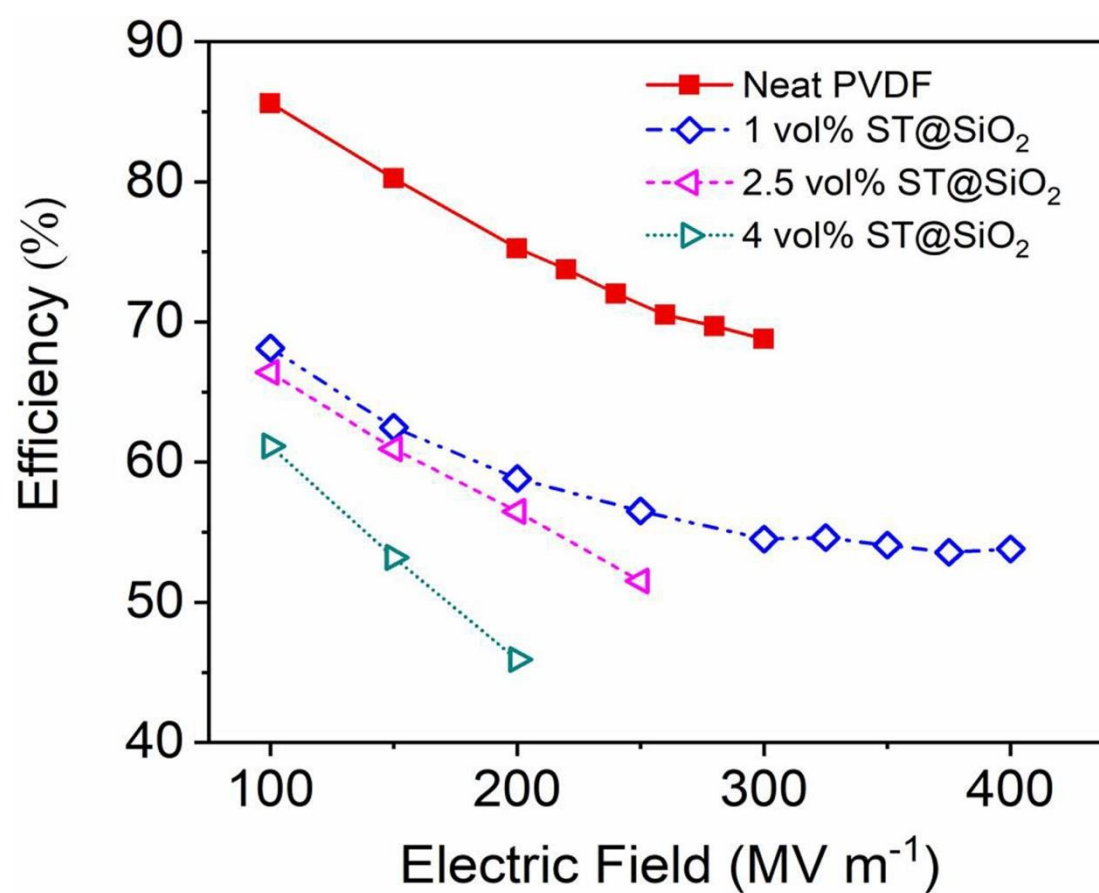

**Figure S6.** Efficiency at varied electric fields of PVDF and composites filled with SrTiO<sub>3</sub> platelets.

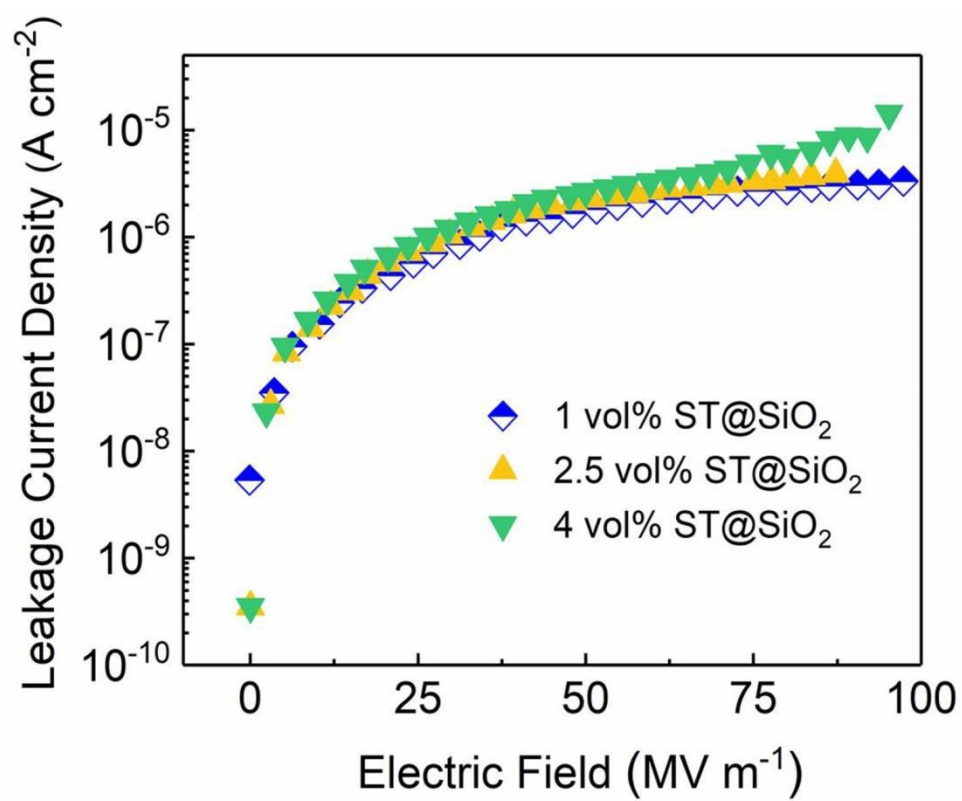

**Figure S7.** Leakage current density at varied electric fields of PVDF and composites filled with SrTiO<sub>3</sub> platelets.
